# Supplementary material for: Genome-wide recruitment to Polycomb-modified chromatin and activity regulation of the synovial sarcoma oncogene SYT-SSX2
Source: PubMed Central journal article supplement (PMC3460777; doi:10.1186/1471-2164-13-189), 2012-05-17

## Additional File 1: Genomic Distribution of SYT-SSX2 Binding Sites

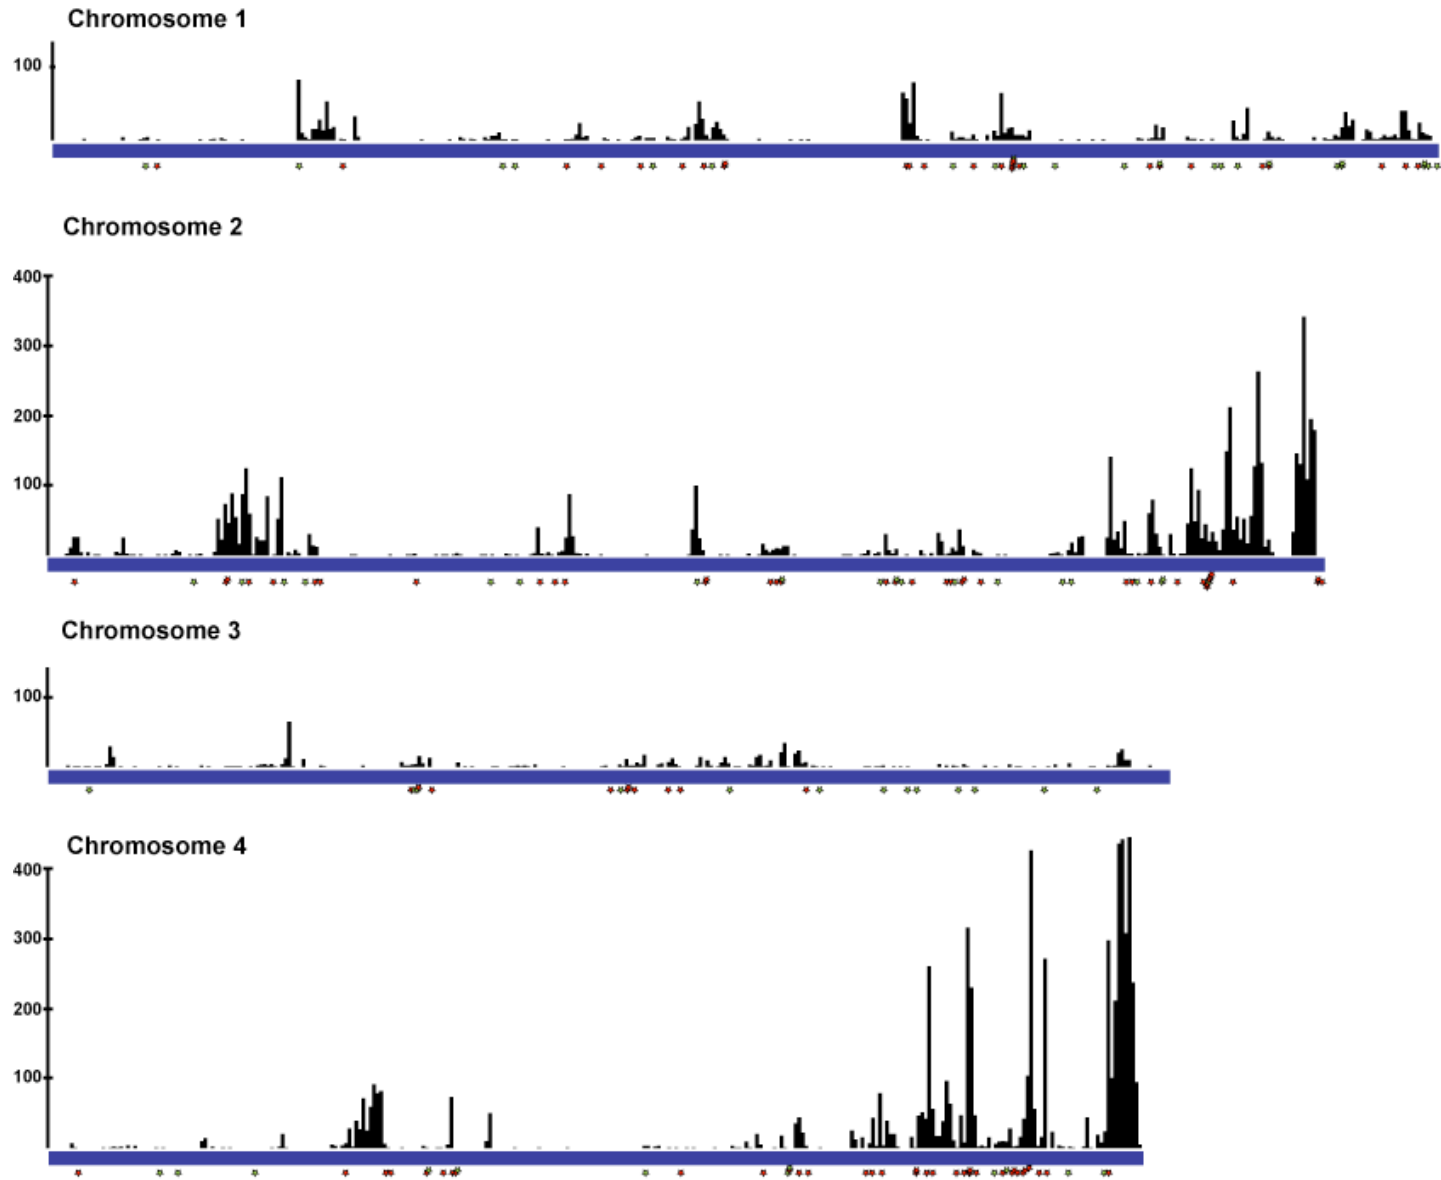

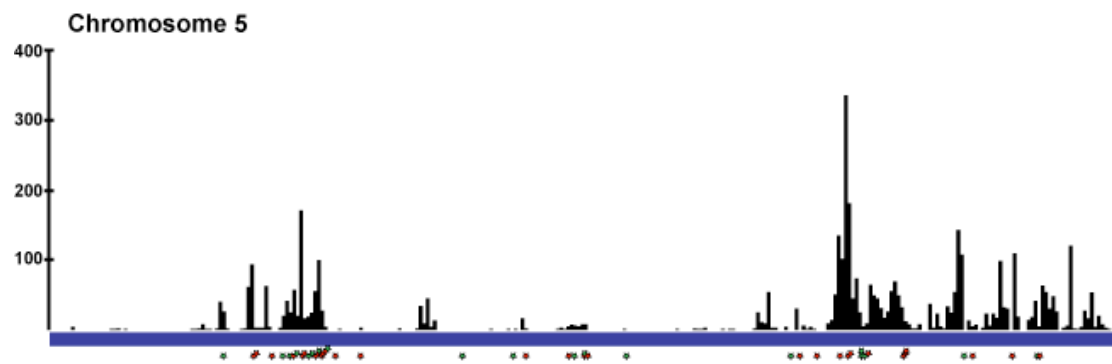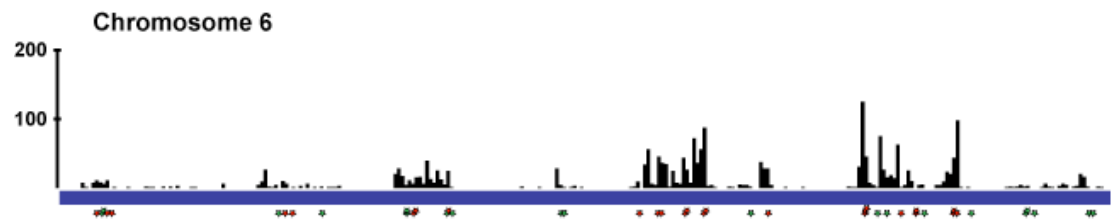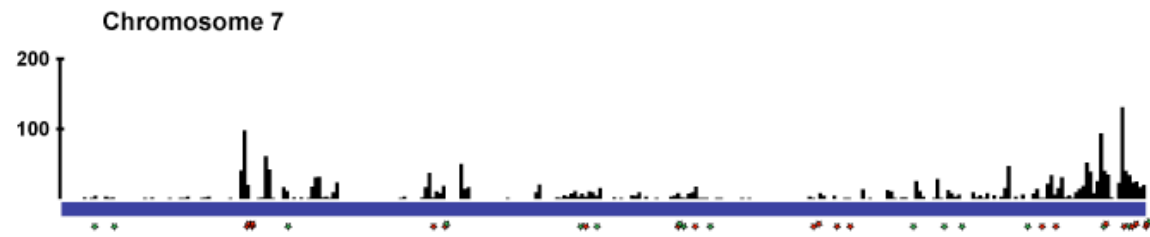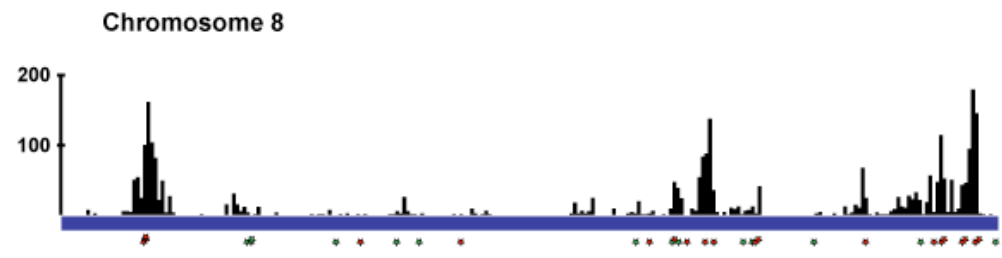

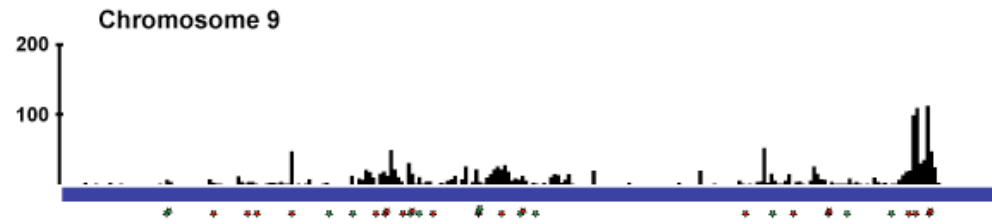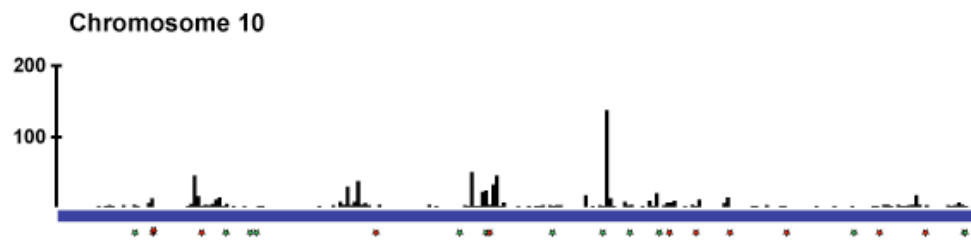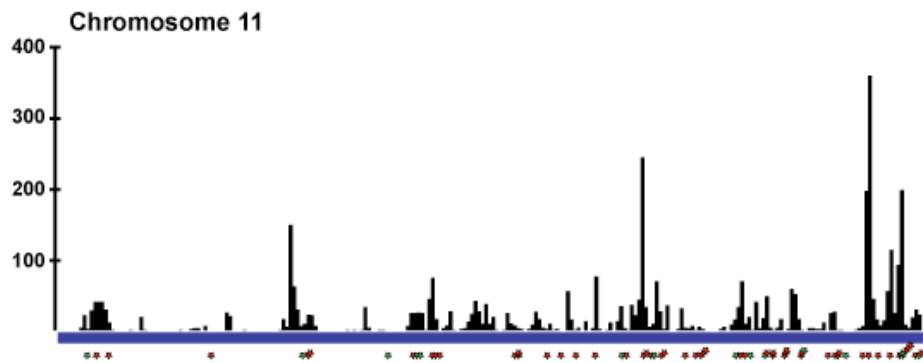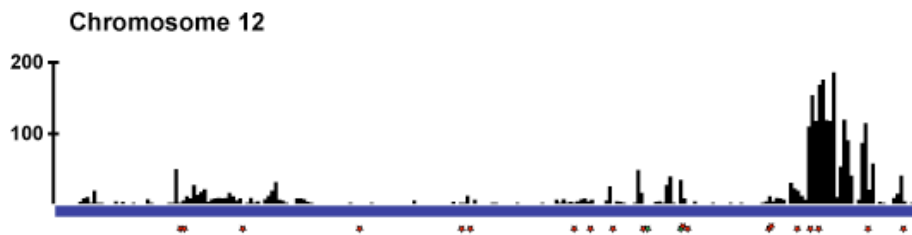

Chromosome 13

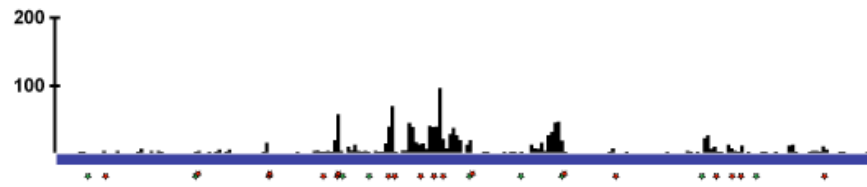

Chromosome 14

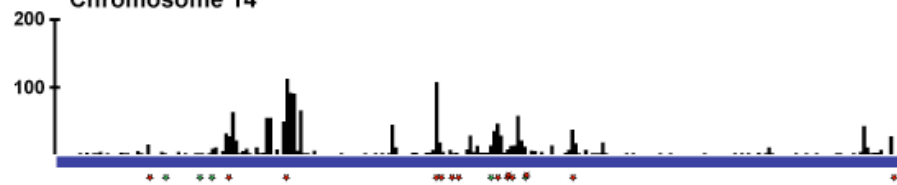

Chromosome 15

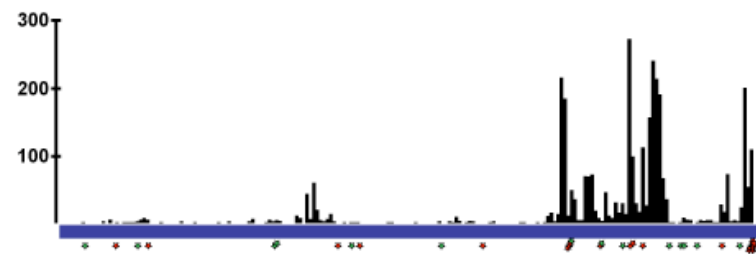

Chromosome 16

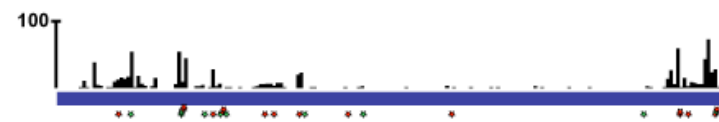

Chromosome 17

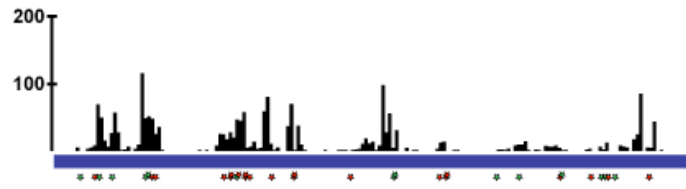

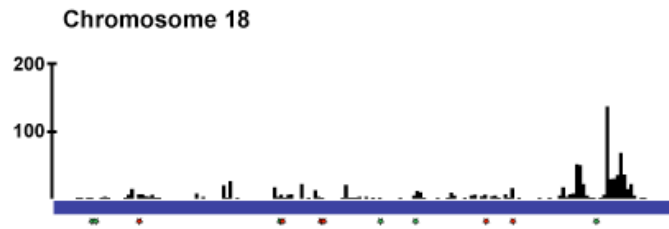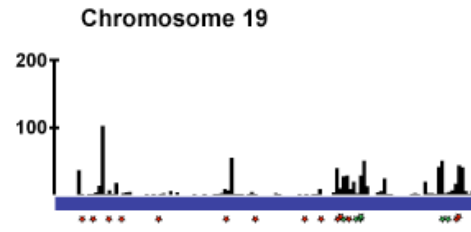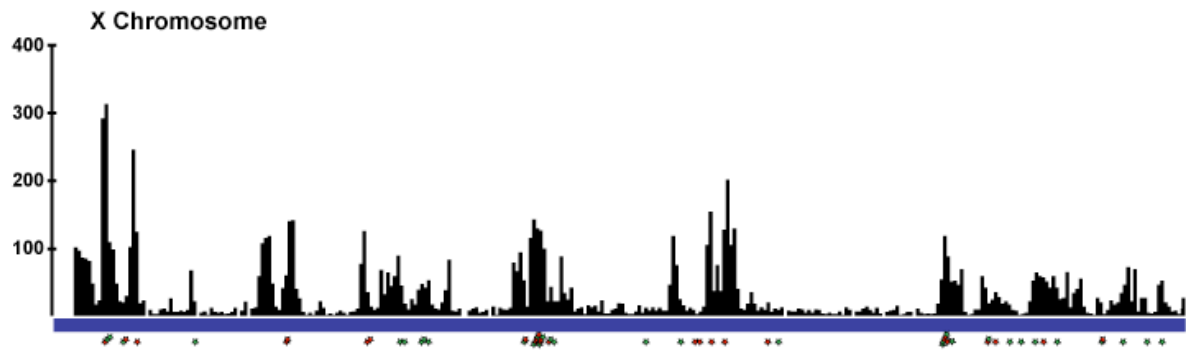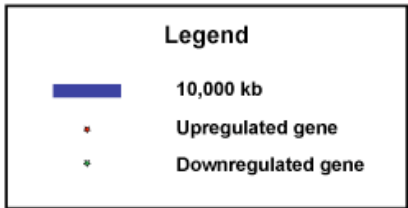

Supplement: 1471-2164-13-189-S1.pdf [file 1471-2164-13-189-S1.pdf]
